# Supplementary material for: Finding qualitative research: an evaluation of search strategies
Source: Springer Nature journal article supplement (doi:10.1186/1471-2288-4-5), 2004-03-16
Supplement: Additional file 2 [file 1471-2288-4-5-s2.doc]

**Additional File 2 – Qualitative Methodology Search Strategies**

**Finding qualitative research: an evaluation of search strategies**

## Strategy 1: Using Thesaurus Terms

| Medline | **Embase** | **Cinahl** | **British Nursing Index** | **ASSIA** | **Social Science Citation Index (SSCI)** |
| --- | --- | --- | --- | --- | --- |
| Qualitative Research/ | qualitative stud$.mp. | Qualitative Studies/ | qualitative stud$.mp. | (qualitative research | (qualitative research |
| Nursing Methodology Research/ | nursing methodology research.mp. | Research Nursing/ | nursing methodology research.mp. | qualitative stud* | qualitative stud* |
| Questionnaires/ | questionnaire/ | exp Questionnaires/ | exp Research Methods/ | nursing research methodology | nursing research methodology |
| exp Attitude/ | attitude/ | exp Attitude/ | exp “patients attitudes and perceptions”/ | questionnaire | questionnaire |
| Focus Groups/ | focus group$.mp. | Focus Groups/ | focus group$.mp. | attitude | attitude |
| discourse analysis.mp. | discourse analysis.mp. | Discourse Analysis/ | discourse analysis.mp. | focus group interviews | focus groups |
| content analysis.mp. | content analysis.mp. | Content Analysis/ | content analysis.mp. | discourse analysis | discourse analysis |
| ethnographic research.mp. | ethnographic research.mp. | Ethnographic Research/ | ethnographic research.mp. | content analysis | content analysis |
| ethnological research.mp. | ethnological research.mp. | Ethnological Research/ | ethnological research.mp. | ethnographic research | ethnographic research |
| ethnonursing research.mp. | ethnonursing research.mp. | Ethnonursing Research/ | ethnonursing research.mp. | ethnological research | ethnological research |
| constant comparative method.mp. | constant comparative method.mp. | Constant Comparative Method/ | constant comparative method.mp. | ethnonursing research | ethnonursing research |
| qualitative validity.mp. | qualitative validity.mp. | exp Qualitative Validity/ | qualitative validity.mp. | constant comparative method | constant comparative method |
| purposive sample.mp. | purposive sample.mp. | Purposive Sample/ | purposive sample.mp. | qualitative validity | qualitative validity |
| observational method$.mp. | observational method$.mp. | exp Observational Methods/ | observational method$.mp. | purposive sampl* | purposive sampl* |
| field stud$.mp. | field stud$.mp. | Field Studies/ | field stud$.mp. | observational research | observational research |
| theoretical sampl$.mp. | theoretical sampl$.mp. | Theoretical Sample/ | theoretical sampl$.mp. | field stud* | field stud* |
| phenomenology/ | phenomenology/ | Phenomenology/ | phenomenology.mp. | theoretical sampl* | theoretical sampl* |
| phenomenological research.mp. | phenomenological research.mp. | Phenomenological Research/ | phenomenological research.mp. | phenomenology | phenomenology |
| life experience$.mp. | life experience$.mp. | exp Life Experiences/ | life experience$.mp. | phenomenological research | phenomenological research |
| cluster sampl$.mp. | cluster sampl$.mp. | exp Cluster Sample/ | cluster sampl$.mp. | life experiences | life experiences |
| or/1-20[[1]](#footnote-2) | or/1-20 | or/1-20 | or/1-20 | cluster sample*) | cluster sample*) |

## Strategy 2: Using Free-text Terms

| Medline | **Embase** | **Cinahl** | **British Nursing Index** | **ASSIA** | **Social Science Citation Index[[2]](#footnote-3)** |
| --- | --- | --- | --- | --- | --- |
| ethnonursing.af. | ethnonursing.af. | ethnonursing.af. | ethnonursing.af. | (ethnonursing | (ethnonursing |
| ethnograph$.mp. | ethnograph$.mp. | ethnograph$.mp. | ethnograph$.mp. | ethnograph* | ethnograph* |
| phenomenol$.af. | phenomenol$.af. | phenomenol$.af. | phenomenol$.af. | phenomenol* | phenomenol* |
| grounded theory.mp. | grounded theory.mp. | grounded theory.mp. | grounded theory.mp. | grounded theor* | grounded theor* |
| (grounded adj (theor$ or study or studies or research or analys?s)).af. | (grounded adj (theor$ or study or studies or research or analys?s)).af. | (grounded adj (theor$ or study or studies or research or analys?s)).af. | (grounded and (theor$ or study or studies or research or analys?s)).af. | grounded stud* | grounded stud* |
| ((life stor$) or (women’s stor$)) | ((life stor$) or (women’s stor$)) | ((life stor$) or (women’s stor$)) | ((life stor$) or (women’s stor$)) | grounded research | grounded research |
| (emic or etic or hermeneutic$ or heuristic$ or semiotic$).af. or (data adj1 saturat$).tw. or (participant observ$).tw. | (emic or etic or hermeneutic$ or heuristic$ or semiotic$).af. or (data adj1 saturat$).tw. or (participant observ$).tw. | (emic or etic or hermeneutic$ or heuristic$ or semiotic$).af. or (data adj1 saturat$).tw. or (participant observ$).tw. | (emic or etic or hermeneutic$ or heuristic$ or semiotic$).af. or (data and saturat$).tw. or (participant observ$).tw. | grounded analys?s | grounded analys?s |
| ((social construct$ or (postmodern$ or post-structural$) or (post structural$ or poststructural$) or (post modern$) or post-modern$ or feminis$ or interpret$).mp. | ((social construct$ or (postmodern$ or post-structural$) or (post structural$ or poststructural$) or (post modern$) or post-modern$ or feminis$ or interpret$).mp. | ((social construct$ or (postmodern$ or post-structural$) or (post structural$ or poststructural$) or (post modern$) or post-modern$ or feminis$ orinterpret$).mp. | ((social construct$ or (postmodern$ or post-structural$) or (post structural$ or poststructural$) or (post modern$) or post-modern$ or feminis$ or interpret$).mp. | life stor* | life stor* |
| (action research or cooperative inquir$ or (co operative inquir$) or (co-operative inquir$)).mp. | (action research or cooperative inquir$ or (co operative inquir$) or (co-operative inquir$)).mp. | (action research or cooperative inquir$ or (co operative inquir$) or (co-operative inquir$)).mp. | (action research or cooperative inquir$ or (co operative inquir$) or (co-operative inquir$)).mp. | women’s stor* | women’s stor* |
| (humanistic or existential or experiential or paradigm$).mp. | (humanistic or existential or experiential or paradigm$).mp. | (humanistic or existential or experiential or paradigm$).mp. | (humanistic or existential or experiential or paradigm$).mp. | emic | emic |
| (field adj (study or studies or research).tw. | (field adj (study or studies or research).tw. | (field adj (study or studies or research).tw. | (field and (study or studies or research).tw. | etic | etic |
| (human science).tw. | (human science).tw. | (human science).tw. | (human science).tw. | hermeneutic* | hermeneutic* |
| (biographical method).tw. | (biographical method).tw. | (biographical method).tw. | (biographical method).tw. | heuristic* | heuristic* |
| (qualitative validity).af. | (qualitative validity).af. | (qualitative validity).af. | (qualitative validity).af. | semiotic* | semiotic* |
| (purposive sampl$).af. | (purposive sampl$).af. | (purposive sampl$).af. | (purposive sampl$).af. | data saturat* | data saturat* |
| (theoretical sampl$).af. | (theoretical sampl$).af. | (theoretical sampl$).af. | (theoretical sampl$).af. | participant observ* | participant observ*) |
| ((purpos$ adj4 sampl$) or (focus adj group$)).af. | ((purpos$ adj4 sampl$) or (focus adj group$)).af. | ((purpos$ adj4 sampl$) or (focus adj group$)).af. | ((purpos$ and sampl$) or (focus and group$)).af. | social construct* | (social construct* |
| (account or accounts or unstructured or open-ended or (open ended) or text$ or narrative$.mp. | (account or accounts or unstructured or open-ended or (open ended) or text$ or narrative$.mp. | (account or accounts or unstructured or open-ended or (open ended) or text$ or narrative$.mp. | (account or accounts or unstructured or open-ended or (open ended) or text$ or narrative$.mp. | postmodern* | postmodern* |
| ((life world) or life-world or conversation analys?s or personal experience$ or theoretical saturation).mp. | ((life world) or life-world or conversation analys?s or personal experience$ or theoretical saturation).mp. | ((life world) or life-world or conversation analys?s or personal experience$ or theoretical saturation).mp. | ((life world) or life-world or conversation analys?s or personal experience$ or theoretical saturation).mp. | post structural* | post structural* |
| (lived experience$).tw. | (lived experience$).tw. | (lived experience$).tw. | (lived experience$).tw. | feminis* | feminis* |
| (life experience$.mp. | (life experience$.mp. | (life experience$.mp. | (life experience$.mp. | interpret* | interpret* |
| (cluster sampl$).mp. | (cluster sampl$).mp. | (cluster sampl$).mp. | (cluster sampl$).mp. | action research | action research |
| (theme$ or thematic).mp. | (theme$ or thematic).mp. | (theme$ or thematic).mp. | (theme$ or thematic).mp. | co-operative inquir* | co-operative inquir* |
| categor$.mp. | categor$.mp. | categor$.mp. | categor$.mp. | humanistic | humanistic |
| observational method$.af. | observational method$.af. | observational method$.af. | observational method$.af. | existential | existential |
| field stud$.mp. | field stud$.mp. | field stud$.mp. | field stud$.mp. | experiential | experiential |
| focus group$.af. | focus group$.af. | focus group$.af. | focus group$.af. | paradigm* | paradigm* |
| questionnaire$.mp. | questionnaire$.mp. | questionnaire$.mp. | questionnaire$.mp. | field stud* | field stud* |
| (content analysis).af. | (content analysis).af. | (content analysis).af. | (content analysis).af. | field research | field research |
| (thematic analysis).af. | (thematic analysis).af. | (thematic analysis).af. | (thematic analysis).af. | human science | human science) |
| (constant comparative).af. | (constant comparative).af. | (constant comparative).af. | (constant comparative).af. | biographical method* | (biographical method* |
| (discourse analys?s).af. | (discourse analys?s).af. | (discourse analys?s).af. | (discourse analys?s).af. | qualitative validity | qualitative validity |
| ((discourse$ or discurs$) adj3 analys?s).tw. | ((discourse$ or discurs$) adj3 analys?s).tw. | ((discourse$ or discurs$) adj3 analys?s).tw. | ((discourse$ or discurs$) and analys?s).tw. | purposive sampl* | purposive sampl* |
| (constant adj (comparative or comparison)).af. | (constant adj (comparative or comparison)).af. | (constant adj (comparative or comparison)).af. | (constant adj (comparative or comparison)).af. | theoretical sampl* | theoretical sampl* |
| (narrative analys?s).af. | (narrative analys?s).af. | (narrative analys?s).af. | (narrative analys?s).af. | open-ended account* | open-ended account* |
| heidegger$.tw. | heidegger$.tw. | heidegger$.tw. | heidegger$.tw. | unstructured account* | unstructured account* |
| colaizzi$.tw. | colaizzi$.tw. | colaizzi$.tw. | colaizzi$.tw. | narrative* | narrative* |
| speigelberg$.tw. | speigelberg$.tw. | speigelberg$.tw. | speigelberg$.tw. | life world | life world |
| (van adj manen$).tw. | (van adj manen$).tw. | (van adj manen$).tw. | (van adj manen$).tw. | conversation analys?s | conversation analys?s) |
| (van adj kaam$).tw. | (van adj kaam$).tw. | (van adj kaam$).tw. | (van adj kaam$).tw. | theoretical saturation | (theoretical saturation |
| (merleau adj ponty$).tw. | (merleau adj ponty$).tw. | (merleau adj ponty$).tw. | (merleau adj ponty$).tw. | lived experience* | lived experience* |
| husserl$.tw. | husserl$.tw. | husserl$.tw. | husserl$.tw. | life experience* | life experience* |
| giorgi$.tw. | giorgi$.tw. | giorgi$.tw. | giorgi$.tw. | cluster sampl* | cluster sampl* |
| foucault$.tw. | foucault$.tw. | foucault$.tw. | foucault$.tw. | theme* | theme* |
| (corbin$ adj2 strauss$).tw. | (corbin$ adj2 strauss$).tw. | (corbin$ adj2 strauss$).tw. | (corbin$ adj2 strauss$).tw. | thematic analysis | thematic analysis |
| (strauss$ adj2 corbin$).tw. | (strauss$ adj2 corbin$).tw. | (strauss$ adj2 corbin$).tw. | (strauss$ adj2 corbin$).tw. | constant comparative | constant comparative |
| (glaser$ adj2 strauss$).tw. | (glaser$ adj2 strauss$).tw. | (glaser$ adj2 strauss$).tw. | (glaser$ adj2 strauss$).tw. | discourse analys?s | discourse analys?s |
| glaser$.tw. | glaser$.tw. | glaser$.tw. | glaser$.tw. | discurs* | discurs* |
| or/1- 48 | or/1- 48 | or/1- 48 | or/1- 48 | narrative analys?s) | narrative analys?s) |
|  |  |  |  | (heidegger* | (heidegger* |
|  |  |  |  | colaizzi* | colaizzi* |
|  |  |  |  | speigelberg* | speigelberg* |
|  |  |  |  | van manen* | van manen* |
|  |  |  |  | van kaam* | van kaam* |
|  |  |  |  | merleau ponty* | merleau ponty* |
|  |  |  |  | husserl* | husserl* |
|  |  |  |  | giorgi* | giorgi* |
|  |  |  |  | foucault* | foucault* |
|  |  |  |  | corbin* | corbin* |
|  |  |  |  | strauss * | strauss * |
|  |  |  |  | glaser*) | glaser*) |

## Strategy 3: Using Broad based Terms

| Medline | **Embase** | **Cinahl** | **British Nursing Index** | **ASSIA** | **Social Sciences Citation Index** |
| --- | --- | --- | --- | --- | --- |
| findings.af. | findings.af. | findings.af. | findings.af. | (findings | (findings |
| interview$.af. or Interviews/ | interview$.af. or Interviews/ | interview$.af. or exp Interviews/ | exp “interviews and interviewing”/ | interview* | interview* |
| qualitative.af. | qualitative.af. | qualitative.af. | qualitative.af. | qualitative) | qualitative) |
| or/1-3 | or/1-3 | or/1-3 | or/1-3 |  |  |

1. Search terms were combined with a Boolean OR on Medline, Embase and Cinahl. On ASSIA and SSCI the same function was performed by placing the terms in brackets. [↑](#footnote-ref-2)
2. There is a limit of 50 terms in SSCI so the qualitative terms were split sequentially in four parts – this is denoted by the brackets – meaning that five searches were completed comprising the breastfeeding terms and sequential sections of the qualitative methodology terms. [↑](#footnote-ref-3)
